# Supplementary material for: A thermal-sensitizing and thermochromic phosphor
Source: Royal Society of Chemistry journal article supplement (doi:10.1039/c7tc03833j), 2017-01-01
Supplement: c7tc03833j1.pdf [file c7tc03833j1.pdf]

## Supporting information

### A thermal-sensitizing phosphor

Xue Tang <sup>1,2</sup>, Xiaodong Li <sup>1</sup>, Zehua Zou <sup>1</sup>, Zhidong Ma <sup>1,2</sup>, Jiachi Zhang <sup>\*1</sup>, Zhaofeng Wang <sup>\*1,2</sup>, Zhipeng Ci <sup>1</sup>, Deyin Wang <sup>1</sup>, Shanglong Peng <sup>1</sup>, Huihui Li <sup>1</sup>, Yuhua Wang

1

1, National & Local Joint Engineering Laboratory for Optical Conversion Materials  
and Technology, Lanzhou University, Lanzhou 730000, P. R. China.

2, State Key Laboratory of Solid Lubrication, Lanzhou Institute of Chemical Physics,  
Chinese Academy of Sciences, Lanzhou 730000, P. R. China

\*Corresponding author: zhangjch@lzu.edu.cn; zhfwang@licp.cas.cn

Tel.: +86-931-8912772, Fax: +86-931-8913554

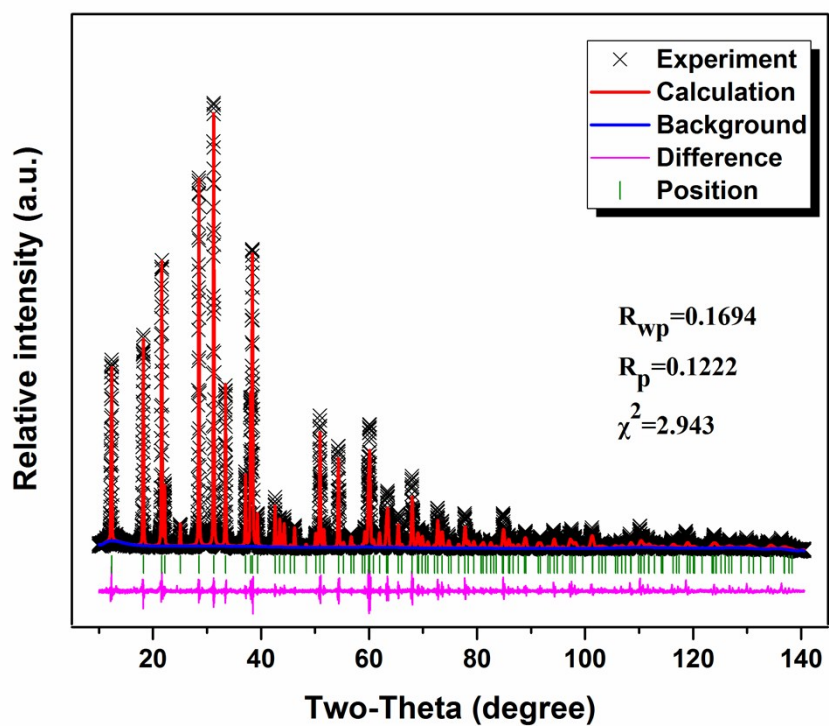

Figure S1, the Rietveld refinement of the  $\text{Na}_2\text{CaGe}_6\text{O}_{14}$  host.

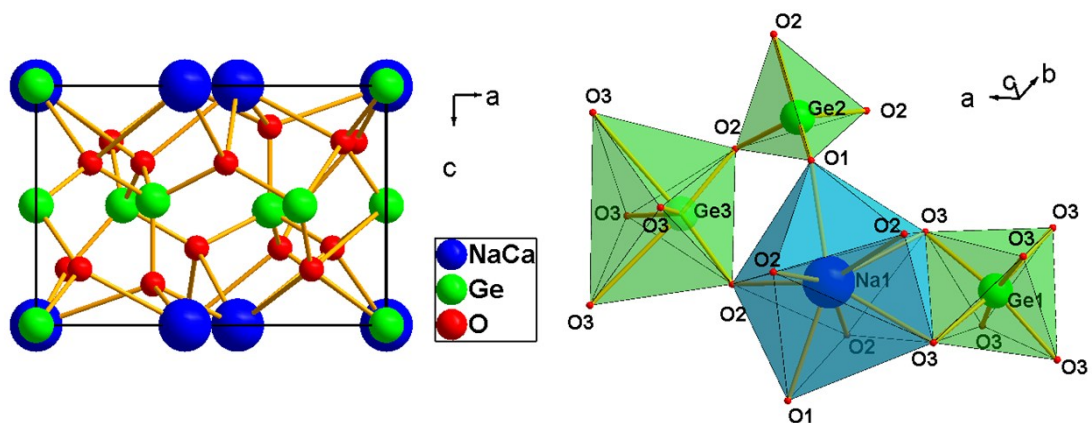

Figure S2a, the crystal structure of the  $\text{Na}_2\text{CaGe}_6\text{O}_{14}$  host and the coordination environment of the  $\text{Na}^+/\text{Ca}^{2+}$ , and  $\text{Ge}^{4+}$  sites.

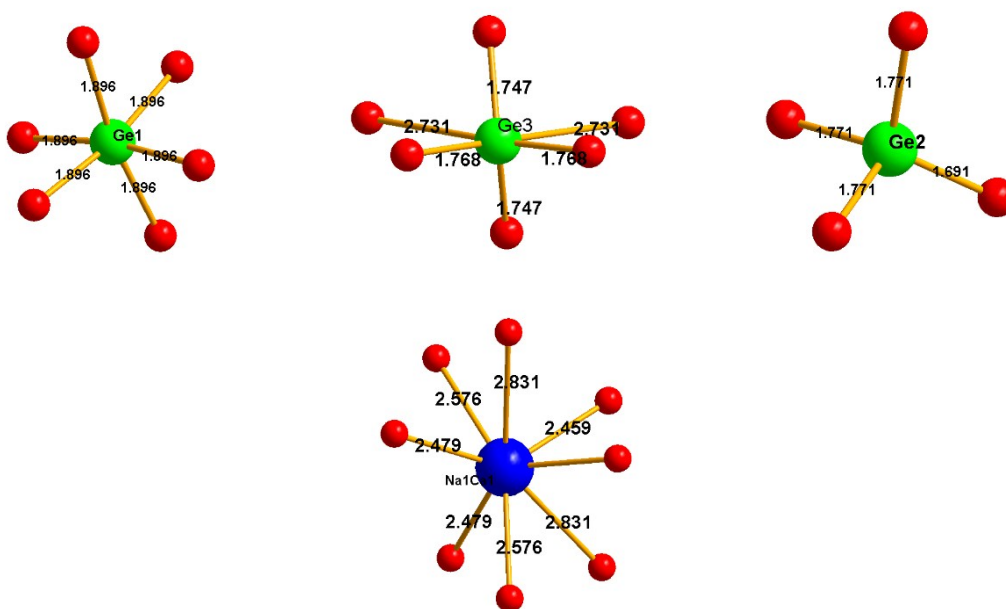

Figure S2b, the distances of the Na–O bonds, Lu–O bonds and Ge–O bonds.

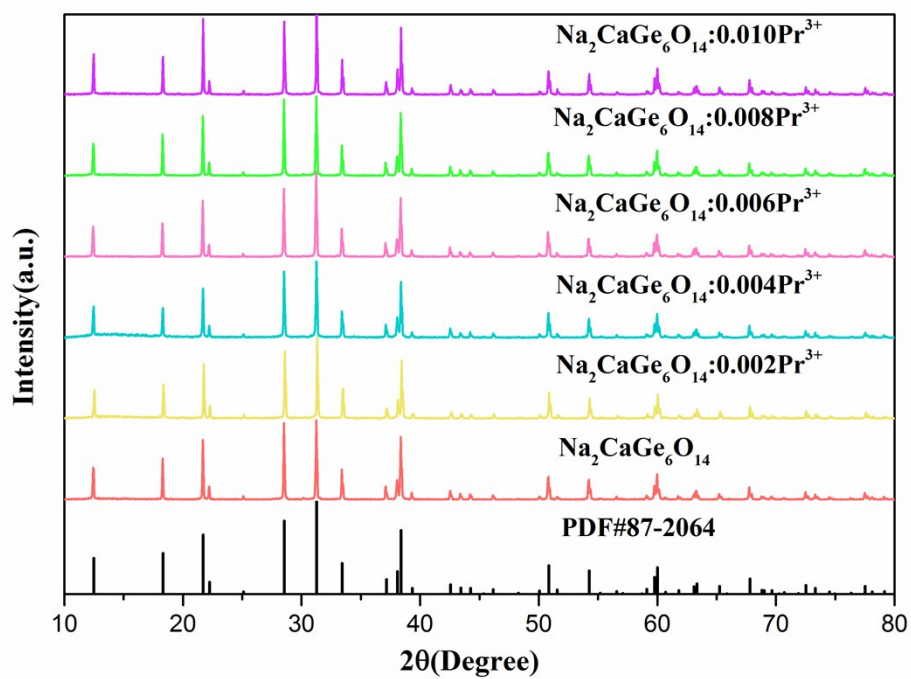

Figure S3, the XRD patterns of the  $\text{Na}_2\text{CaGe}_6\text{O}_{14}:\text{xPr}^{3+}$  samples with the different  $\text{Pr}^{3+}$  doping contents.

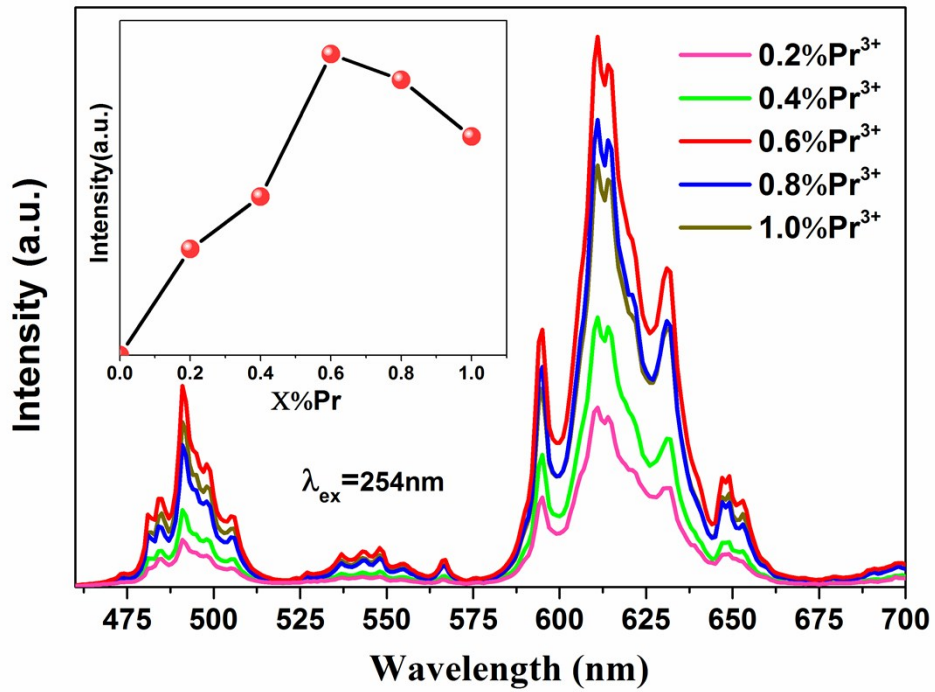

Figure S4, the PL emission spectra of the  $\text{Na}_2\text{CaGe}_6\text{O}_{14}:\text{xPr}^{3+}$  samples with the different  $\text{Pr}^{3+}$  doping contents under 254 nm excitation, and the emission intensity of the samples as a function of the  $\text{Pr}^{3+}$  contents (inset).

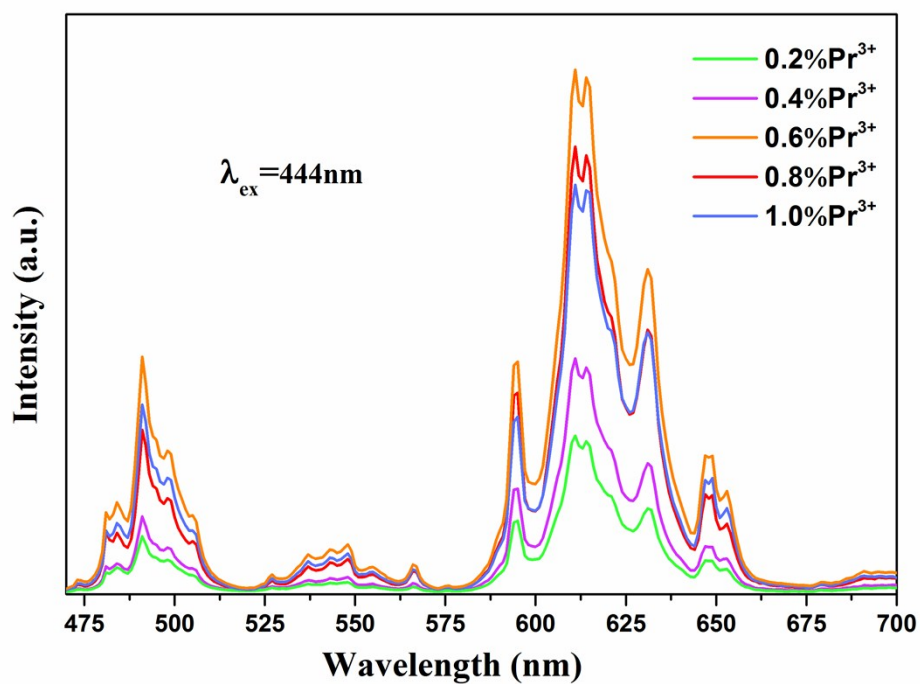

Figure S5, the PL emission spectra of the  $\text{Na}_2\text{CaGe}_6\text{O}_{14}:\text{xPr}^{3+}$  samples with the different Pr<sup>3+</sup> doping contents under 444 nm excitation.

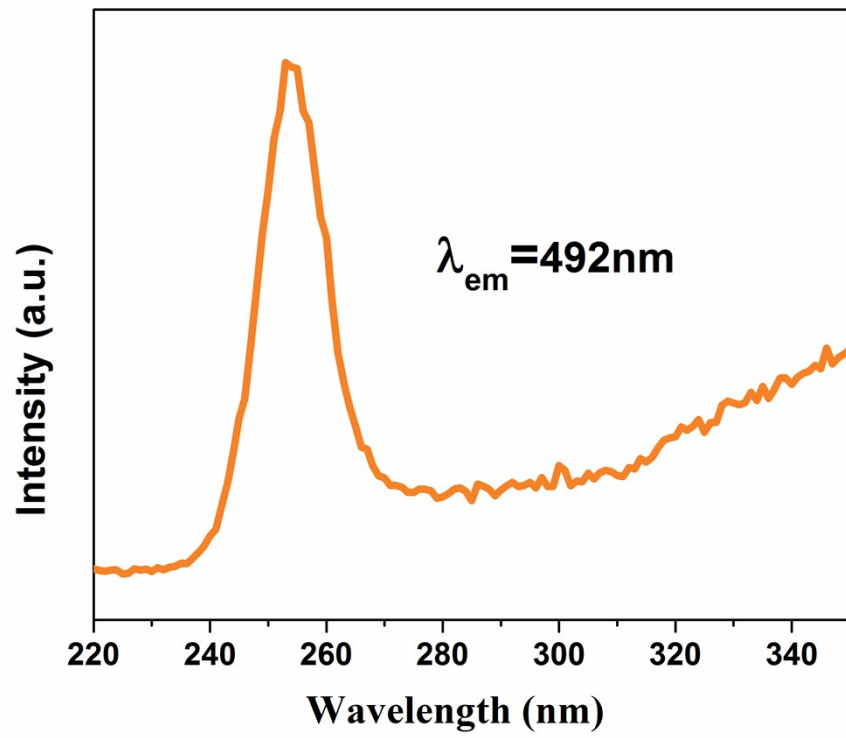

Figure S6, the PL excitation spectrum of the typical  $\text{Na}_2\text{CaGe}_6\text{O}_{14}:0.6\text{mol}\%\text{Pr}^{3+}$  sample monitored at 492 nm.

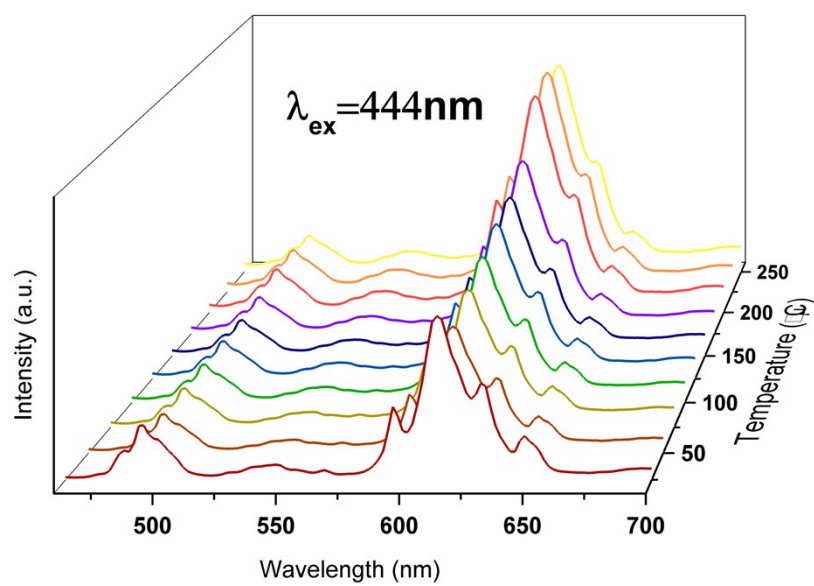

Figure S7a, the PL emission spectra excited at 444 nm of the typical  $\text{Na}_2\text{CaGe}_6\text{O}_{14}:0.6\text{mol}\%\text{Pr}^{3+}$  sample at different temperature.



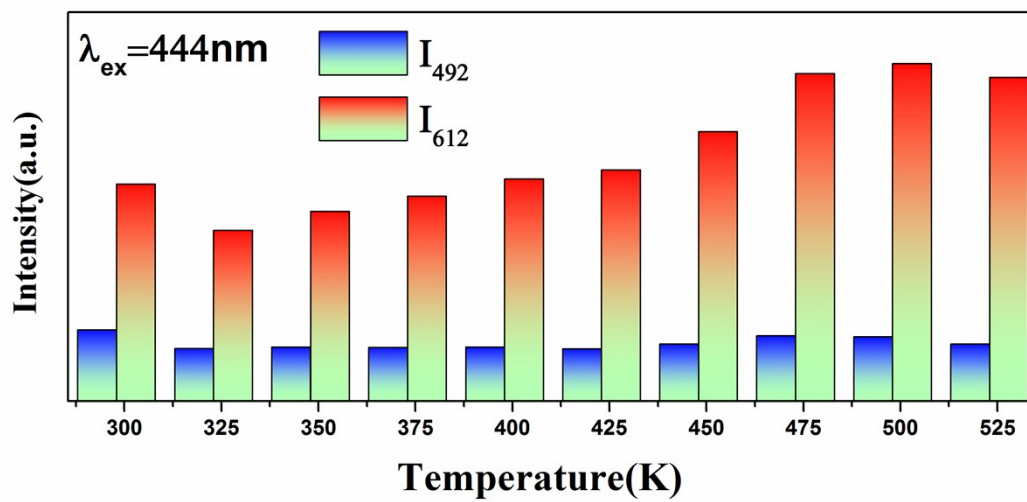

Figure S7b, the PL emission intensity excited at 444 nm of the typical

$\text{Na}_2\text{CaGe}_6\text{O}_{14}:0.6\text{mol}\%\text{Pr}^{3+}$  sample at different temperature.

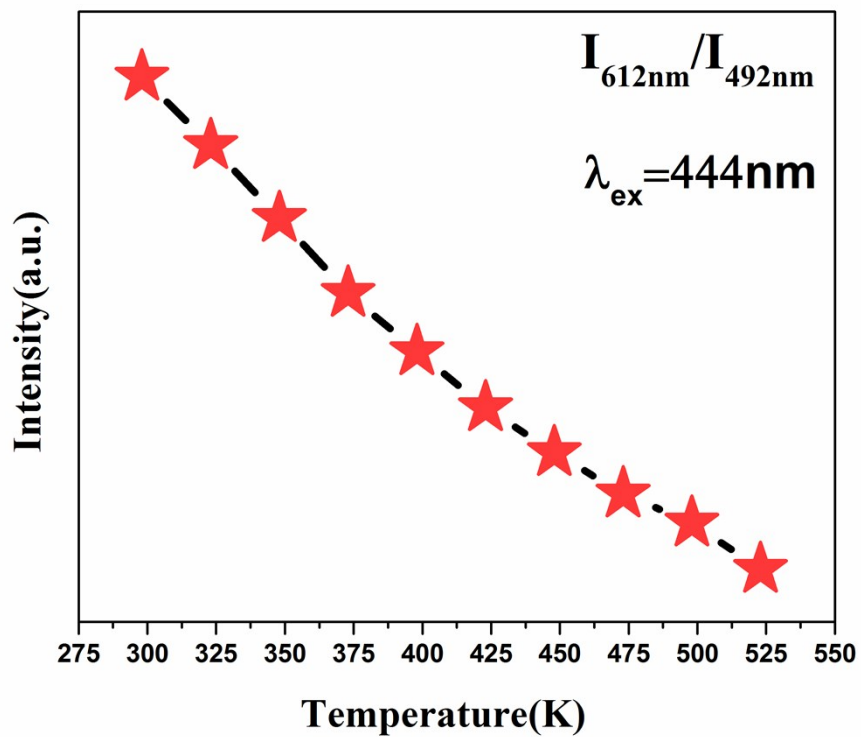

Figure S8, the emission intensity ratio ( $I_{612}/I_{492}$ ,  $\lambda_{\text{ex}} = 444 \text{ nm}$ ) of the typical

$\text{Na}_2\text{CaGe}_6\text{O}_{14}:\text{0.6mol\%Pr}^{3+}$  sample as a function of temperature.

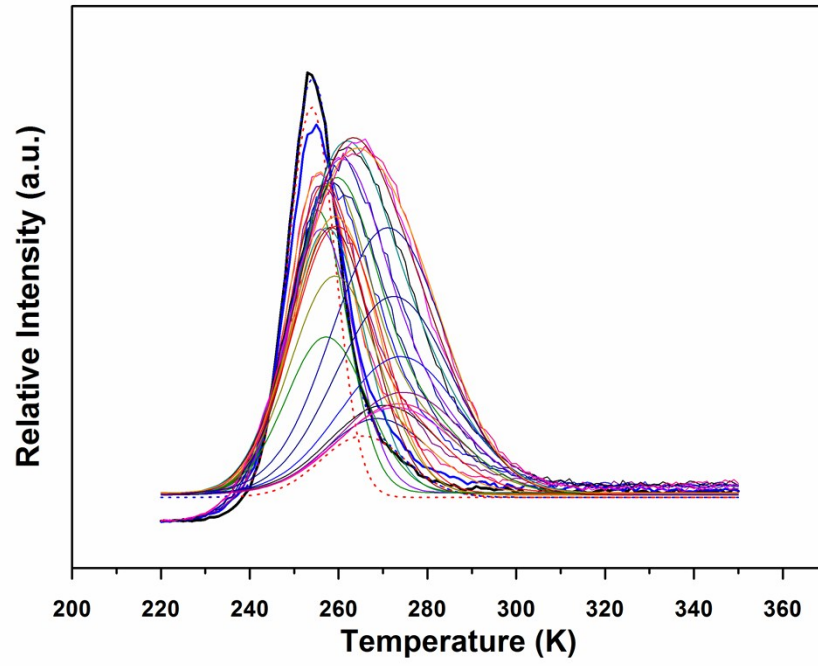

Figure S9, the excitation components at about 254 nm and 266 nm of the typical  $\text{Na}_2\text{CaGe}_6\text{O}_{14}:\text{0.6mol\%Pr}^{3+}$  sample recorded at different temperatures.

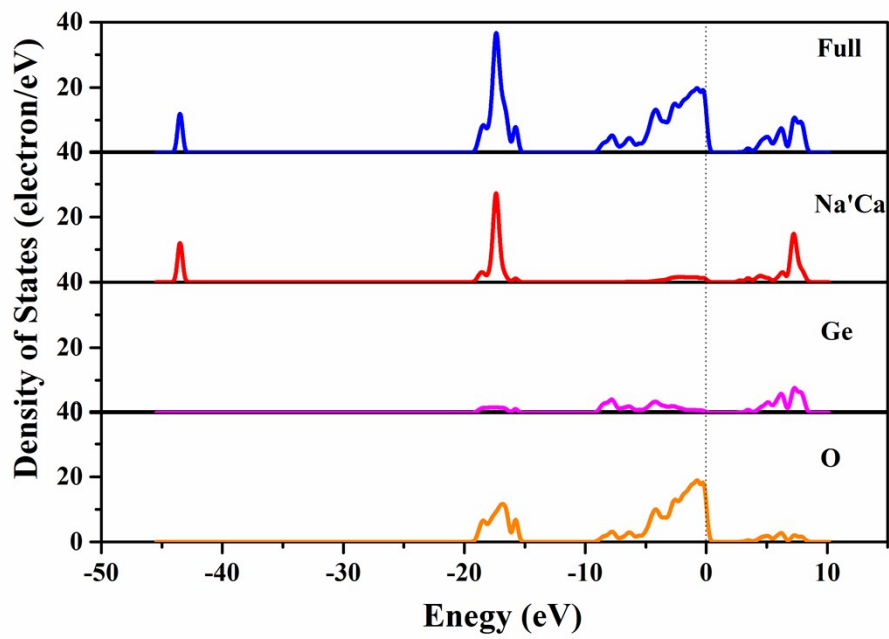

Figure S10, the partial density of the states of the typical  $\text{Na}_2\text{CaGe}_6\text{O}_{14}$  sample.

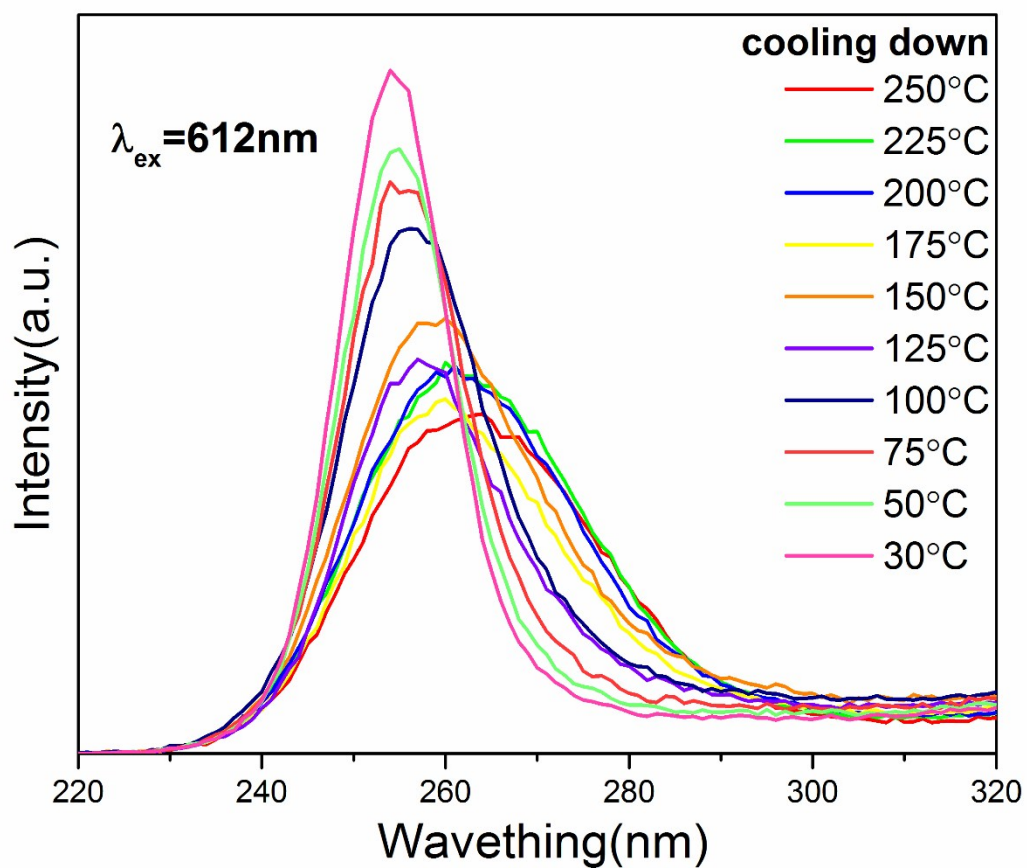

Figure S11, The temperature dependence PL excitation spectra ( $\lambda_{\text{em}} = 612 \text{ nm}$ ) of the  $\text{Na}_2\text{Ca}_{0.994}\text{Ge}_6\text{O}_{14}:0.6\%\text{Pr}^{3+}$  sample.

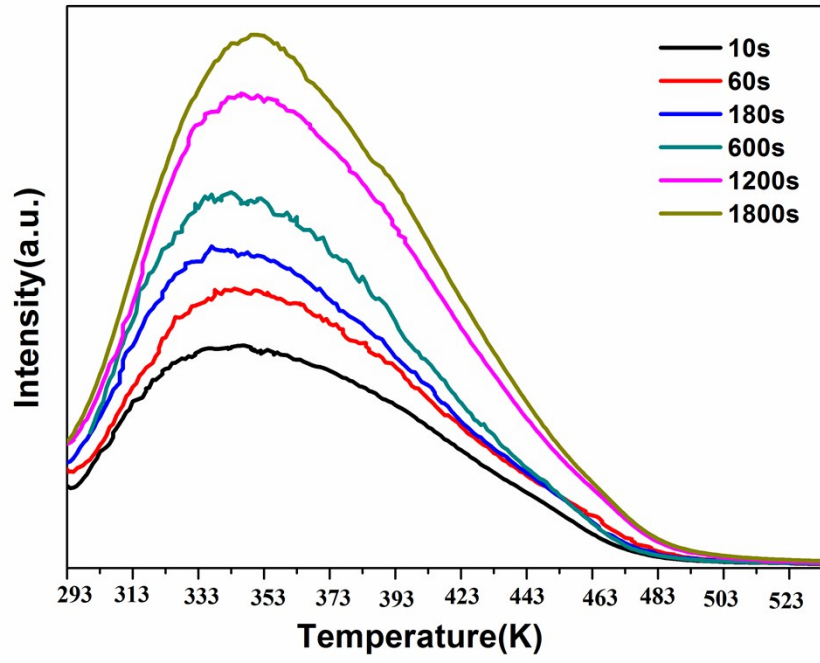

Figure S12, a serial of the TL charging experiments of the typical

$\text{Na}_2\text{CaGe}_6\text{O}_{14}:\text{0.6mol\%Pr}^{3+}$  sample.

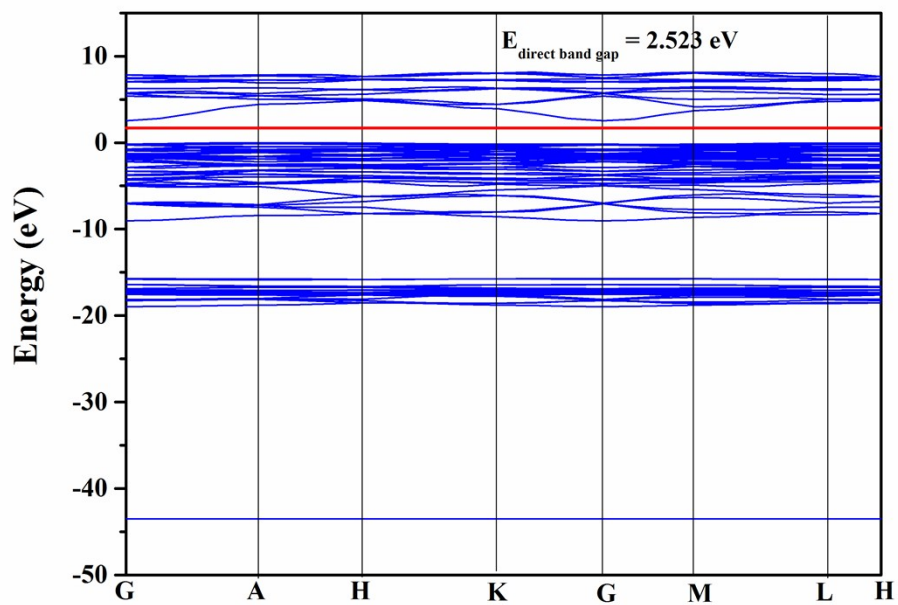

Figure S13, the optimized density functional theory (DFT) calculations on the imperfect crystal of the  $\text{Na}_2\text{CaGe}_6\text{O}_{14}$  with  $\text{Na}^+$  vacancy.

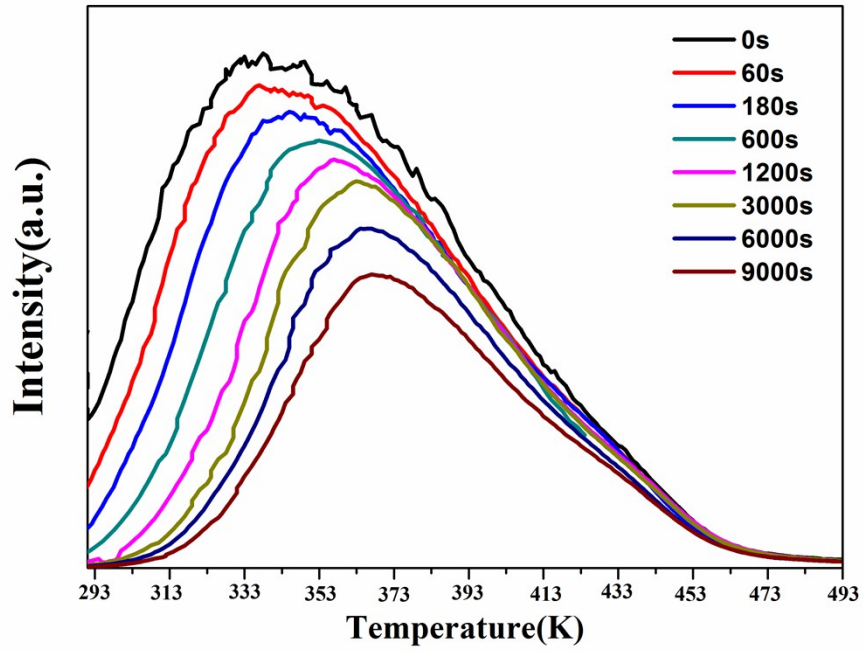

Figure S14, a serial of TL fading experiments of the typical  $\text{Na}_2\text{CaGe}_6\text{O}_{14}:0.6\text{mol}\%\text{Pr}^{3+}$  sample at different delay time after stopping the irradiation.



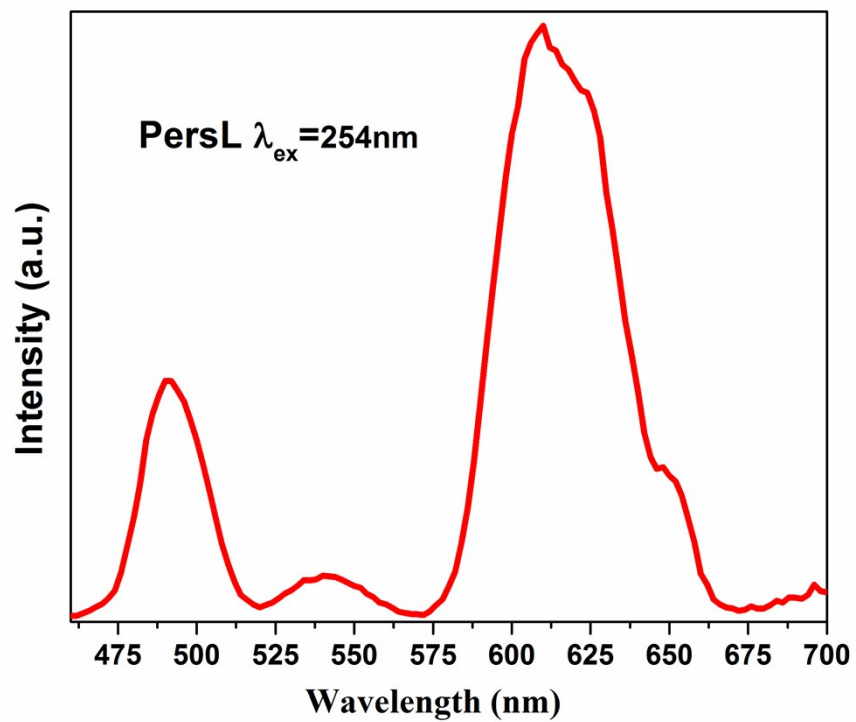

Figure S15a, the persistent luminescence spectrum of the typical  $\text{Na}_2\text{CaGe}_6\text{O}_{14}:0.6\text{mol}\%\text{Pr}^{3+}$  sample recorded after 254 nm irradiation for 10 min at room temperature.

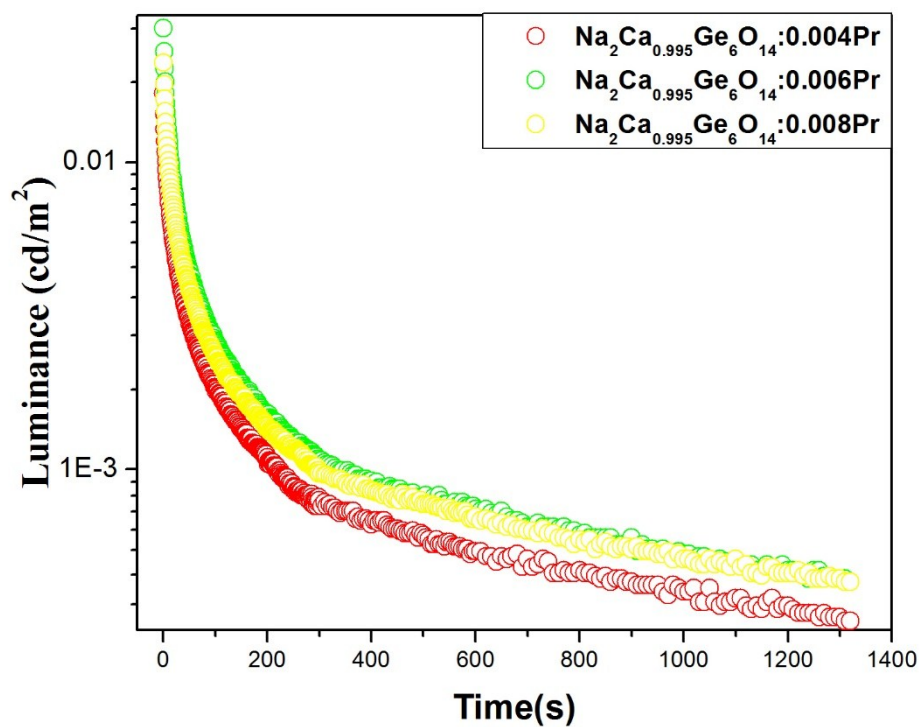

Figure S15b, the persistent luminescence decay curves of the typical  $\text{Na}_2\text{CaGe}_6\text{O}_{14}:x\text{mol}\%\text{Pr}^{3+}$  ( $x = 0.4, 0.6$  and  $0.8$ ) samples recorded after 254 nm irradiation for 10 min at room temperature.

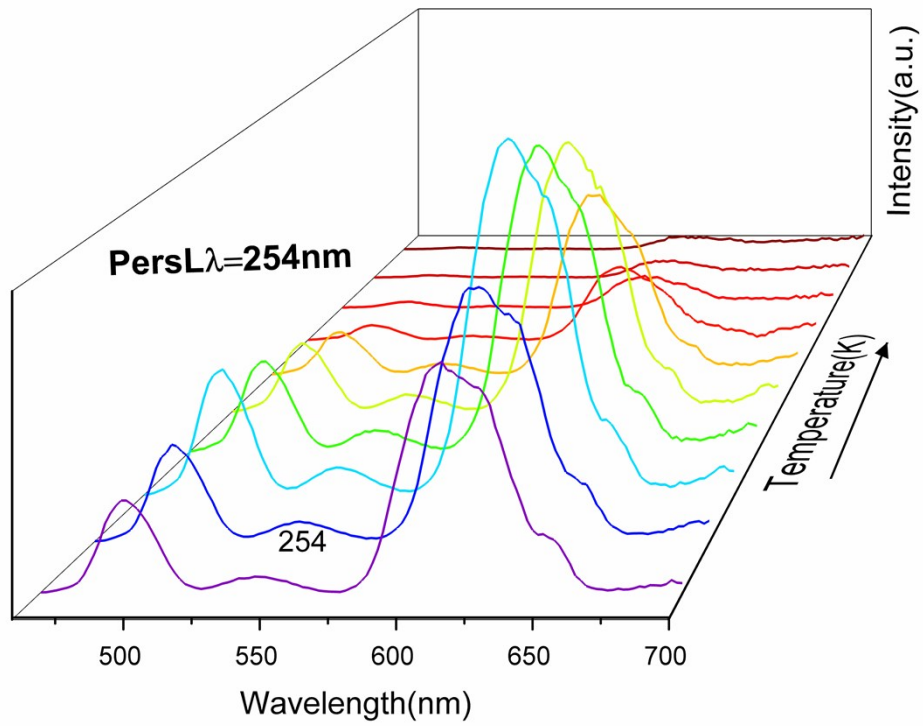

Figure S16, the persistent luminescence spectra of the typical  $\text{Na}_2\text{CaGe}_6\text{O}_{14}:0.6\text{mol\%Pr}^{3+}$  sample recorded at different temperatures after 254 nm irradiation for 10 min.

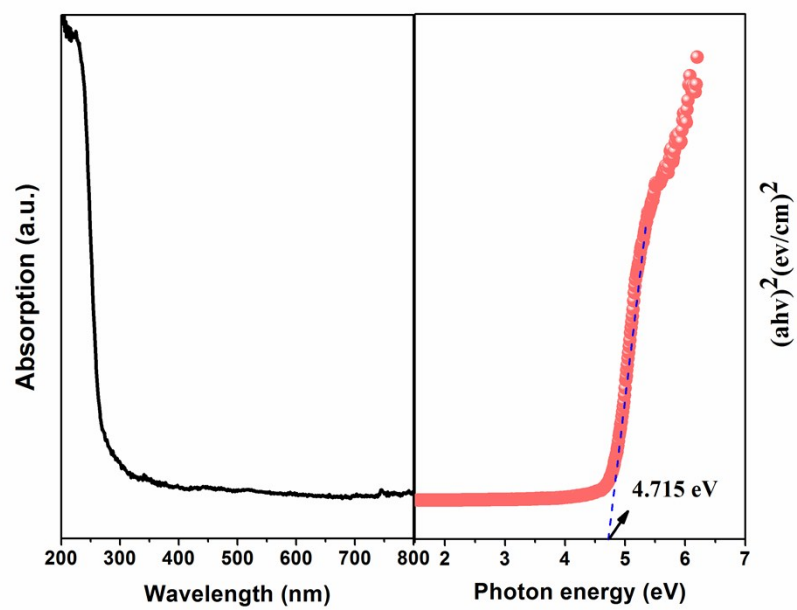

Figure S17, the diffusion reflectance spectrum of the  $\text{Na}_2\text{CaGe}_6\text{O}_{14}$  host.

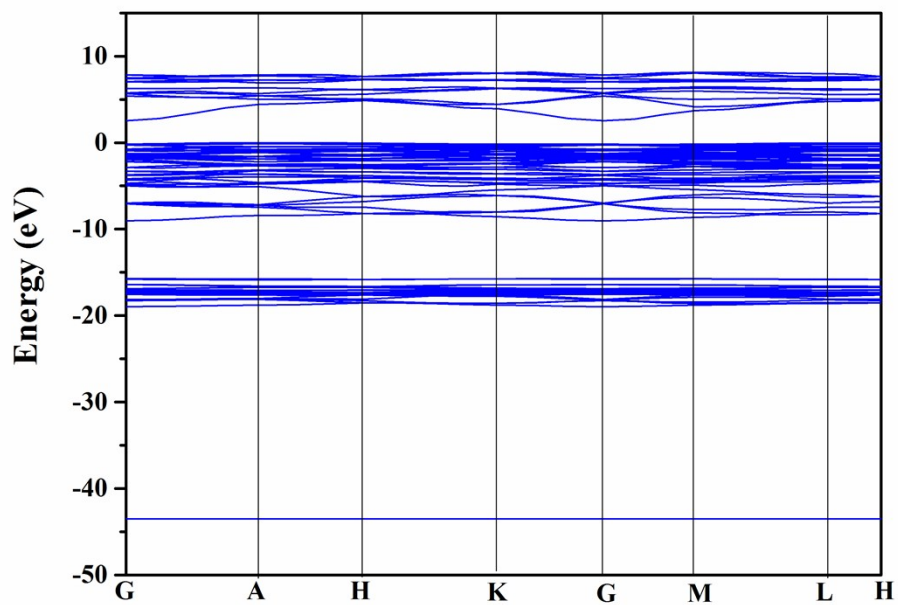

Figure S18, the density functional theory (DFT) calculations on the perfect crystal of  
the  $\text{Na}_2\text{CaGe}_6\text{O}_{14}$  host.

Table S1, the refined crystallographic data of the Na<sub>2</sub>CaGe<sub>6</sub>O<sub>14</sub>.

| Na <sub>2</sub> CaGe <sub>6</sub> O <sub>14</sub> |                                     |
|---------------------------------------------------|-------------------------------------|
| Crystal system                                    | Trigonal                            |
| Space group                                       | P 321 (150)                         |
| Lattice parameters                                |                                     |
| a(Å)                                              | 8.18493                             |
| b(Å)                                              | 8.18493                             |
| c(Å)                                              | 4.84076                             |
| $\alpha^\circ=\beta^\circ$                        | 90                                  |
| $\gamma^\circ$                                    | 120                                 |
| Cell volume(Å <sup>3</sup> )                      | 280.850                             |
| T/K                                               | 289                                 |
| Diffractometer                                    | Rigaku D/Max-2400                   |
| Radiation/Å                                       | Cu-K $\alpha$ ( $\lambda= 1.5405$ ) |
| Absorption correction                             | multi-scan                          |
| $2\theta$ range $^\circ$ /                        | 8-140                               |
| Z                                                 | 1                                   |
| Calculated Density                                | 2.6552g/cm <sup>3</sup>             |
| R-factors                                         |                                     |
| R <sub>wp</sub>                                   | 0.1694                              |
| R <sub>p</sub>                                    | 0.1222                              |

Table S2, the refined coordinates of the all atoms in the Na<sub>2</sub>CaGe<sub>6</sub>O<sub>14</sub>.

| <b>Space group</b>     |             | <b>P321 (150) - trigonal</b>                              |            |                  |                        |
|------------------------|-------------|-----------------------------------------------------------|------------|------------------|------------------------|
| <b>Cell</b>            |             | <b>a = 8.18493(0) Å; b = 8.18493(0) Å; c = 4.84076(0)</b> |            |                  |                        |
| <b>Ion coordinates</b> | <b>x</b>    | <b>y</b>                                                  | <b>z</b>   | <b>Occupancy</b> | <b>U<sub>iso</sub></b> |
| Na1                    | 0.4238(7)   | 0.0000(0)                                                 | 0.0000(0)  | 1.000(0)         | 0.002710)              |
| Ca1                    | 0.4237(8)   | 0.0000(0)                                                 | 0.0000(0)  | 1.000(0)         | 0.009050)              |
| Ge1                    | 0.0000(0)   | 0.0000(0)                                                 | 0.0000(0)  | 1.000(0)         | 0.041150)              |
| Ge2                    | 0.33330(0)  | 0.6667(0)                                                 | 0.3451(16) | 1.000(0)         | 0.503250)              |
| Ge3                    | 0.75299(20) | 0.0000(0)                                                 | 0.5000(0)  | 1.000(0)         | 0.052290)              |
| O1                     | 0.33330(0)  | 0.6667(0)                                                 | 0.5260(5)  | 1.000(0)         | 0.070750)              |
| O2                     | 0.4139(9)   | 0.2741(9)                                                 | 0.7412(12) | 1.000(0)         | 0.050510)              |
| O3                     | 0.1851(9)   | 0.0313(18)                                                | 0.4216(27) | 1.000(0)         | 0.413070)              |

Table S3, the bond lengths of X-O and the unit cell parameters of the Na<sub>2</sub>CaGe<sub>6</sub>O<sub>14</sub> as determined by the GSAS program.

| <b>The bond lengths of X-O</b> |                   |               |                   |
|--------------------------------|-------------------|---------------|-------------------|
| <b>Vector</b>                  | <b>Length (Å)</b> | <b>Vector</b> | <b>Length (Å)</b> |
| Na1-O2                         | 2.606(8)          | Ge1_O3        | 2.538(15)         |
| Na1-O2                         | 2.483(7)          | Ge1-O3        | 1.722(13)         |
| Na1-O2                         | 2.606(8)          | Ge1_O3        | 2.478(11)         |
| Na1-O3                         | 2.923(12)         | Ge2_O1        | 0.876(8)          |
| Ca1-O2                         | 2.606(8)          | Ge2_O2        | 1.920(7)          |
| Ca1-O2                         | 2.483(8)          | Ge3_O2        | 1.725(6)          |
| Ca1-O2                         | 2.606(8)          | Ge3_O3        | 1.620(15)         |
| Ca1-O3                         | 2.923(12)         | Ge3_O3        | 2.044(10)         |
| Ge1-O3                         | 2.478(11)         | Ge3_O3        | 1.620(15)         |



Table S4, the ion radius (8 coordinations) and the electronegativity of the Na<sup>2+</sup>, Ca<sup>2+</sup>, Ge<sup>4+</sup>, Pr<sup>3+</sup> ions in the Na<sub>2</sub>CaGe<sub>6</sub>O<sub>14</sub>.

| <b>Ion</b>       | <b><i>r</i> / Å</b> | <b><i>r</i> difference / %</b> |
|------------------|---------------------|--------------------------------|
| Na <sup>+</sup>  | 1.18                | 4.7%                           |
| Ca <sup>2+</sup> | 1.12                | 0.5%                           |
| Ge <sup>4+</sup> | 0.53                | 52.9%                          |
| Pr <sup>3+</sup> | 1.12                | --                             |

$$r \text{ difference} = (r_{\text{solute}} - r_{\text{solvent}}) / r_{\text{solvent}} \times 100\%$$

Table S5, the relative sensitivities of some recently reported optical thermometry

| Phosphors                                                                                            | Relative sensitivities (K <sup>-1</sup> ) | References |
|------------------------------------------------------------------------------------------------------|-------------------------------------------|------------|
| Y <sub>3</sub> Al <sub>5</sub> O <sub>12</sub> :Eu <sup>3+</sup> /Mn <sup>4+</sup>                   | 0.441                                     | [1]        |
| Y <sub>2</sub> O <sub>3</sub> :Eu <sup>3+</sup> ,Nd <sup>3+</sup>                                    | 0.1                                       | [2]        |
| Zn <sub>2</sub> SiO <sub>4</sub> :Mn <sup>2+</sup> /Gd <sub>2</sub> O <sub>3</sub> :Eu <sup>3+</sup> | 0.07                                      | [3]        |
| Na <sub>2</sub> La <sub>2</sub> Ti <sub>3</sub> O <sub>10</sub> :Pr <sup>3+</sup>                    | 0.4                                       | [4]        |
| MgLa <sub>2</sub> TiO <sub>6</sub> :Pr <sup>3+</sup>                                                 | 0.054                                     | [4]        |
| YNbO <sub>4</sub> :Pr <sup>3+</sup>                                                                  | 0.105                                     | [4]        |
| CaZnOS:Er <sup>3+</sup>                                                                              | 0.0033                                    | [5]        |

[1] D. Q. Chen, S. Liu, Y. Zhou, Z. Y. Wan, P. Huang, Z. G. Jia, *J. Mater. Chem. C*, 2016,4, 9044-9051.

[2] S. S. Zhou, X. T. Wei, X. Y. Li, Y. H. Chen, C. K. Duan, M. Yin, *Sens. Actuators B*, 2017, 246, 352-357.

[3] F. Huang, D. Q. Chen, *J. Mater. Chem. C*, 2017,5, 5176-5182

[4] Y. Gao, F. Huang, H. Lin, J. Xu, Y. S. Wang, *Sens. Actuators B*, 2017, 243, 137-143.

[5] H. L. Zhang, D. F. Peng, W. Wang, L. Dong, C. F. Pan, *J. Phys. Chem. C*, 2015, 119, 28136-28142.
